# Supplementary material for: A new half-condensed Schiff base platform: structures and sensing of Zn2+ and H2PO4− ions in an aqueous medium
Source: Royal Society of Chemistry journal article supplement (doi:10.1039/d0dt01594f), 2020-01-01
Supplement: d0dt01594f1.pdf [file d0dt01594f1.pdf]

*Supplementary Information for*

**A new half-condensed Schiff base platform: structures, sensing of Zn<sup>2+</sup> and H<sub>2</sub>PO<sub>4</sub><sup>-</sup> ions in aqueous medium**

Sujaya Chakraborty<sup>a</sup>, Somenath Lohar<sup>a</sup>, Koushik Dhara<sup>b</sup>, Raktim Ghosh<sup>c</sup>, Somasri Dam<sup>c</sup>,  
Ennio Zangrando<sup>d</sup> and Pabitra Chattopadhyay<sup>\*,a</sup>

<sup>a</sup>*Department of Chemistry, The University of Burdwan, Golapbag, Purba Burdwan-713104, India.*

<sup>b</sup>*Department of Chemistry, Sambhu Nath College, Labpur, Birbhum 731303, West Bengal, India.*

<sup>c</sup>*Department of Microbiology, The University of Burdwan, Golapbag, Burdwan 713104, India.*

<sup>d</sup>*Dipartimento di Scienze Chimiche e Farmaceutiche, via Giorgieri, 1, 34127 Trieste, Italy.*

## CONTENTS

1. **Fig. S1.**  $^1\text{H}$  NMR spectrum of **HL'** (i.e. generated **HL** in solution) in  $\text{d}_6$ -acetone
2. **Fig. S2.**  $^{13}\text{C}$  NMR spectrum of **HL'** (i.e. generated **HL** in solution) in  $\text{d}_6$ -acetone
3. **Fig. S3.** HRMS spectrum of **HL'** (i.e. generated **HL** in solution) in MeOH [found  $m/z$ , 329.1288 and  $m/z$ , 351.1103, calculated for  $[\text{M}+\text{H}^+]$  ( $m/z$ , 329.1285) and  $[\text{M}+\text{Na}^+]$  ( $m/z$ , 351.11040) respectively, where M was  $\text{C}_{21}\text{H}_{16}\text{N}_2\text{O}_2$  (**HL**)].
4. **Fig. S4.** Crystal packing of **HL'**.
5. **Fig. S5.** HRMS of the **Zn<sub>2</sub>L<sub>4</sub>** complex.
6. **Fig. S6.** Time dependent fluorescence study of **HL'** (i.e. generated **HL** in solution) (10  $\mu\text{M}$ ) in presence of  $\text{Zn}^{2+}$  ion (100  $\mu\text{M}$ ) in reaction buffer [10 mM HEPES, water/DMSO v/v 3:1, pH 7.4] at 25  $^\circ\text{C}$  ( $\lambda_{\text{ex}}$ : 355 nm).
7. **Fig. S7.** Selectivity study of **Zn<sub>2</sub>L<sub>4</sub>** complex.
8. **Fig. S8.** pH study of **Zn<sub>2</sub>L<sub>4</sub>** complex towards  $\text{H}_2\text{PO}_4^-$  ion.
9. **Fig. S9.** LOD of **Zn<sub>2</sub>L<sub>4</sub>** complex for  $\text{H}_2\text{PO}_4^-$  ion.
10. **Fig. S10.** Time dependent fluorescence of **Zn<sub>2</sub>L<sub>4</sub>** complex in presence of  $\text{H}_2\text{PO}_4^-$ .
11. **Fig. S11.** UV-vis spectra of **HL'**, **HL'**+  $\text{Zn}^{2+}$  ion, and **HL'**+  $\text{Zn}^{2+}$  +  $\text{H}_2\text{PO}_4^-$  ion in reaction buffer at 25  $^\circ\text{C}$ , ( here also **HL'** as **HL** in solution state)
12. **Fig. S12.** Fluorescence spectra of **HL'**, **HL'**+  $\text{Zn}^{2+}$  ion, and **HL'**+  $\text{Zn}^{2+}$  +  $\text{H}_2\text{PO}_4^-$  ion (here also **HL'** as **HL** in solution state)
13. **Fig. S13.** HRMS data of the reaction between **Zn<sub>2</sub>L<sub>4</sub>** complex and  $\text{H}_2\text{PO}_4^-$  ion, found at  $m/z$ , 329.1292 and at  $m/z$ , 351.1108, calculated for  $[\text{M}+\text{H}^+]$  ( $m/z$ , 329.1285) and  $[\text{M}+\text{Na}^+]$  ( $m/z$ , 351.1104) respectively where M was  $\text{C}_{21}\text{H}_{16}\text{N}_2\text{O}_2$  (**HL**) in MeOH. Mass experiment was carried out with the filtrate obtained after the mixing of **Zn(II)** complex and  $\text{H}_2\text{PO}_4^-$  ion in the reaction buffer for 20 min.
14. **Table S1** Crystallographic data and details of refinements for **HL'** and **Zn<sub>2</sub>L<sub>4</sub>** complex
15. **Table S2** Selected bond distances ( $\text{\AA}$ ) and bond angles ( $^\circ$ ) for **HL'**.
16. **Table S3** Selected bond distances ( $\text{\AA}$ ) and bond angles ( $^\circ$ ) for **Zn<sub>2</sub>L<sub>4</sub>** complex.

## Materials and general methods

All the analytical reagent grade solvents and the other reagent grade chemicals consumed in this work were procured from commercial sources and used as received. Here, throughout the experiments, Milli-Q 18  $\Omega$  water was employed. 2,6-Diformyl-p-cresol was synthesized following the literature procedure<sup>1</sup>. *2-hydroxy-5-methyl-3-[(2-phenylamino-phenylimino)-methyl]-benzaldehyde* was prepared by the method mentioned in the manuscript. Elemental analyses (C, H and N) were carried out on a Perkin Elmer 2400 CHN elemental analyzer. The electrospray ionization (ESI) mass spectra were measured using the Waters (Xevo G2 Q-TOF) mass spectrometer. Systronics digital pH meter (model 335) was used for pH study and the adjustment of pH was done using either 50 mM HCl or NaOH solution. Absorption spectra were measured using a Shimadzu-2450 UV-vis spectrophotometer. Fluorescence measurements were performed with a Hitachi-4500 spectrofluorimeter (All emission spectra were collected with the emission slits set at 5 nm.).

The selectivity study was carried out by  $\text{Li}^+$ ,  $\text{Na}^+$ ,  $\text{K}^+$ , and  $\text{Cs}^+$ ,  $\text{Mg}^{2+}$ ,  $\text{Ba}^{2+}$ ,  $\text{Ca}^{2+}$ ,  $\text{Sr}^{2+}$ ,  $\text{Fe}^{2+}$ ,  $\text{Fe}^{3+}$ ,  $\text{Co}^{2+}$ ,  $\text{Ni}^{2+}$ ,  $\text{Cu}^{2+}$ ,  $\text{Zn}^{2+}$ ,  $\text{Cd}^{2+}$ ,  $\text{Pb}^{2+}$ ,  $\text{Cr}^{3+}$ , and  $\text{Hg}^{2+}$  metal ion of chloride, nitrate, sulphate and acetate salts and the sodium/potassium salts of hypochlorite, chlorate, thiocyanate, cyanide, azide, bicarbonate, nitrate, arsenite, arsenate, monohydrogen phosphate, phosphate, sulphate, sulphide and tetrabutylammonium salts of halides ( $\text{F}^-$ ,  $\text{Cl}^-$ ,  $\text{Br}^-$ ,  $\text{I}^-$ ), acetate, dihydrogen phosphate etc. in 10 mM HEPES buffer, pH 7.4, water/DMSO (v/v 3:1) solution with an HL' concentration of 10  $\mu\text{M}$  solution. In the study of selectivity, the amount of the cations and anions were taken as 10 equivalent greater than that of the probe used.

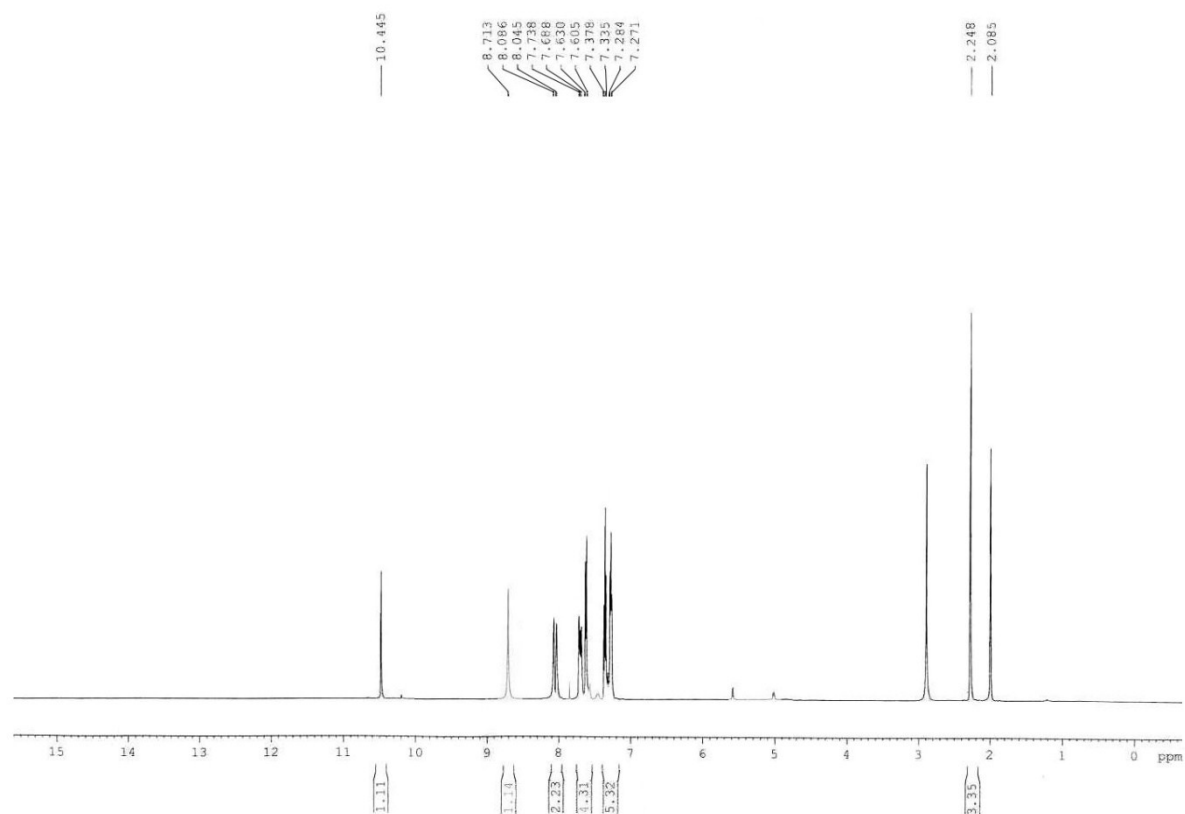

**Fig. S1.**  $^1\text{H}$  NMR spectrum of **HL'** (i.e. generated **HL** in solution) in  $\text{d}_6$ -acetone

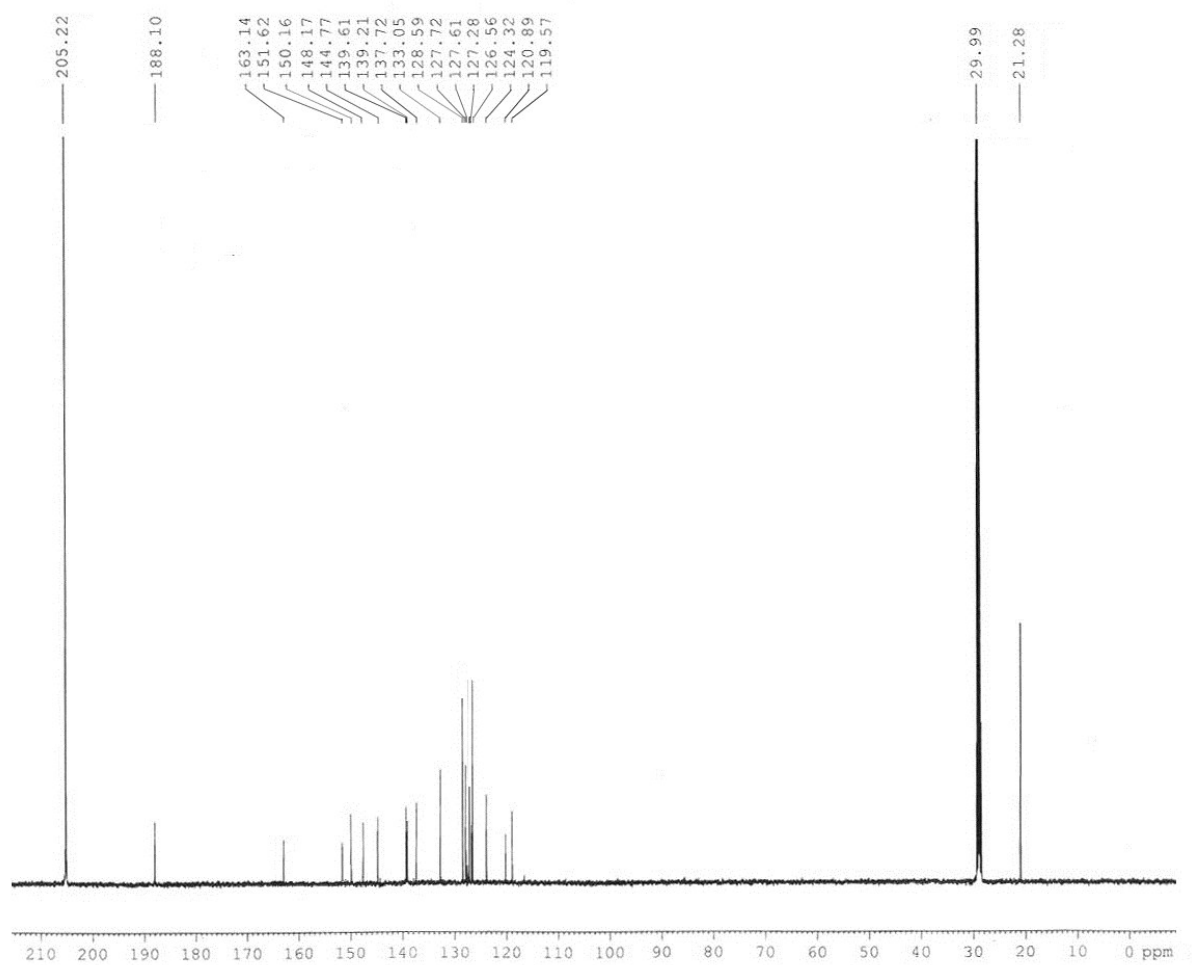

**Fig. S2.** <sup>13</sup>C NMR spectrum of **HL'** (i.e. generated **HL** in solution) in d<sub>6</sub>-acetone

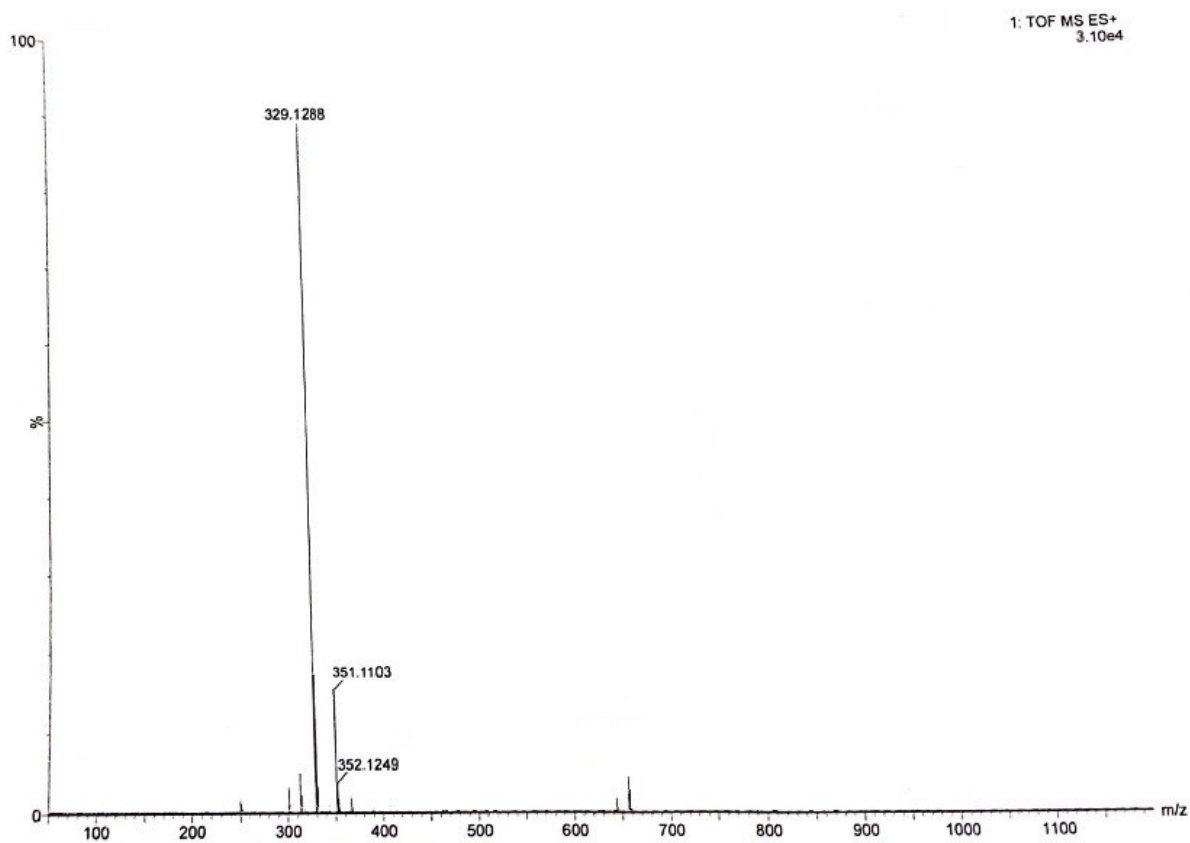

**Fig. S3.** HRMS spectrum of **HL'** (i.e. generated **HL** in solution) in MeOH [found m/z, 329.1288 and m/z, 351.1103, calculated for  $[M+H^+]$  (m/z, 329.1285) and  $[M+Na^+]$  (m/z 351.11040 respectively, where M is  $C_{21}H_{16}N_2O_2$  (HL)].

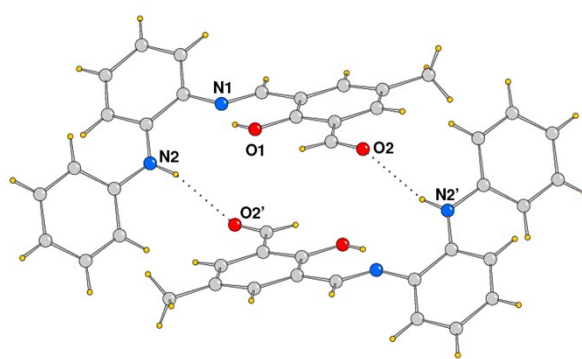

**Fig. S4.** Formation of centrosymmetric dimers in the crystal packing of HL' through weak NH...O hydrogen bonds.

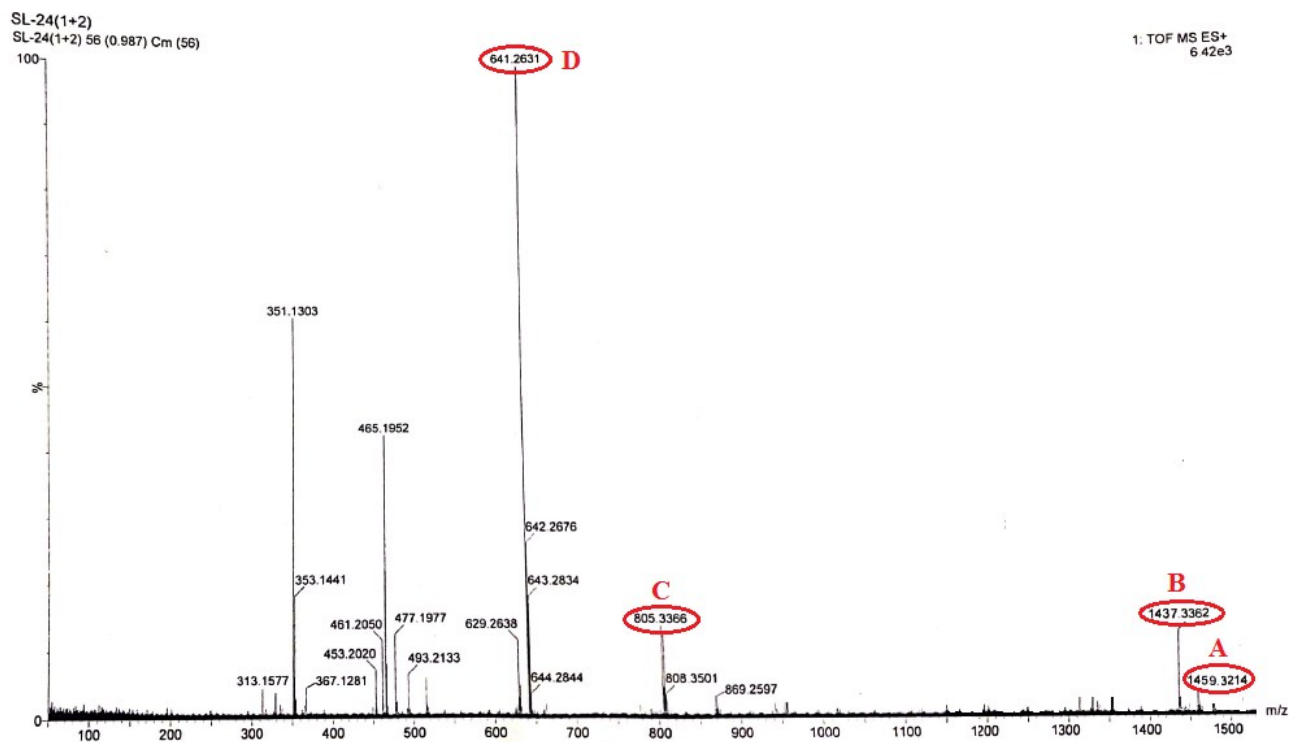

**A:**  $[\text{Zn}_2\text{L}_4+\text{Na}^+]$ , (Exact Mass: 1459.3009); **B:**  $[\text{Zn}_2\text{L}_4+\text{H}^+]$ , (Exact Mass: 1437.3190);  
**C:**  $\{[\text{ZnL}_2(\text{MeOH})_2]+\text{Na}^+\}$ , (Exact Mass: 805.1980);

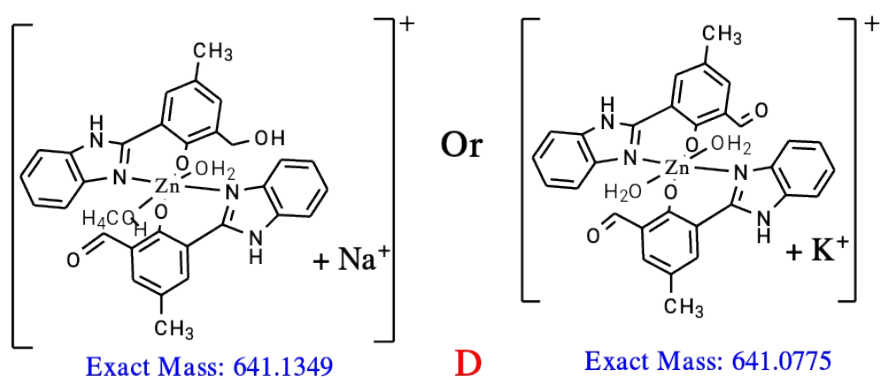

**Fig.S5.** HRMS of the  $\text{Zn}^{2+}$  complex ( $\text{Zn}_2\text{L}_4$ ) in methanol.



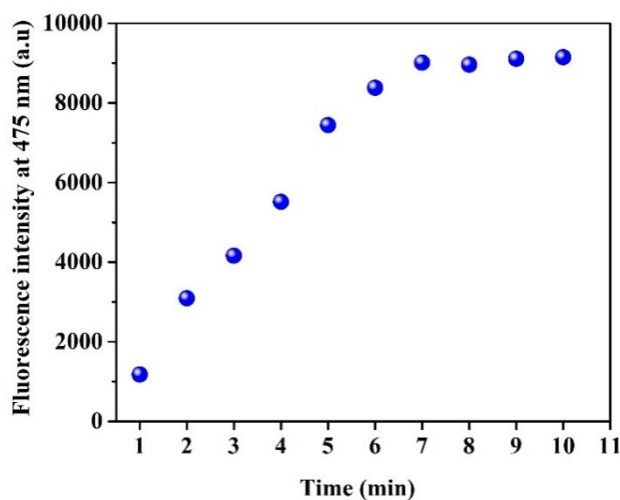

**Fig. S6.** Time dependent fluorescence study of **HL'** (i.e. generated **HL** in solution) (10  $\mu\text{M}$ ) in presence of  $\text{Zn}^{2+}$  ion (100  $\mu\text{M}$ ) in reaction buffer [10 mM HEPES, water/DMSO v/v 3:1, pH 7.4] at 25  $^{\circ}\text{C}$  ( $\lambda_{\text{ex}}$ : 355 nm).

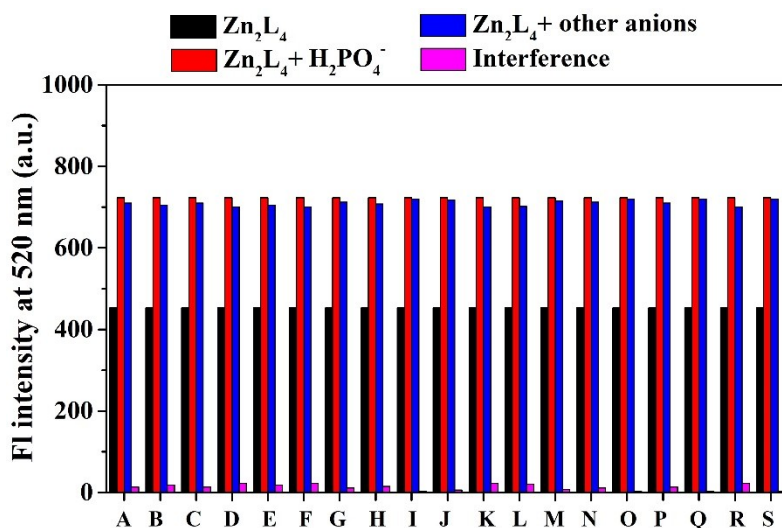

**Fig. S7.** Relative fluorescence study of the mixture of  $\text{Zn}_2\text{L}_4$  complex (10  $\mu\text{M}$ ) in presence of  $\text{H}_2\text{PO}_4^-$  ion (100  $\mu\text{M}$ ) and other anions (A)  $\text{F}^-$ , (B)  $\text{Cl}^-$ , (C)  $\text{Br}^-$ , (D)  $\text{CN}^-$ , (E)  $\text{I}^-$ , (F)  $\text{SCN}^-$ , (G)  $\text{NO}_3^-$ , (H)  $\text{ClO}_3^-$ , (I)  $\text{ClO}_4^-$ , (J)  $\text{H}_2\text{AsO}_4^-$ , (K)  $\text{HSO}_4^-$ , (L)  $\text{HS}^-$ , (M)  $\text{HAsO}_4^{2-}$ , (N)  $\text{S}^{2-}$ , (O)  $\text{S}_2\text{O}_3^{2-}$ , (P)  $\text{SO}_4^{2-}$ , (Q)  $\text{HPO}_4^{2-}$ , (R)  $\text{PO}_4^{3-}$  and (S)  $\text{P}_2\text{O}_7^{4-}$  in reaction buffer at 25  $^{\circ}\text{C}$  ( $\lambda_{\text{ex}}$ : 355 nm).

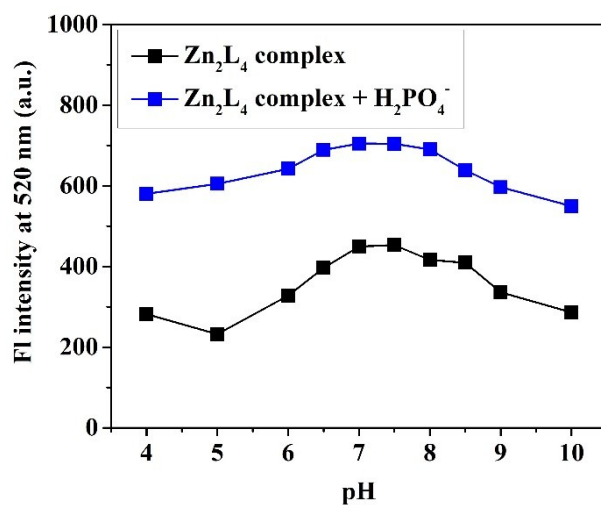

**Fig. S8.** pH study of Zn<sub>2</sub>L<sub>4</sub> complex (10  $\mu$ M) in absence and presence of H<sub>2</sub>PO<sub>4</sub><sup>-</sup> ion(100  $\mu$ M) in reaction buffer of pH 4 to 10 at 25  $^{\circ}$ C ( $\lambda_{\text{ex}}$ : 355 nm).

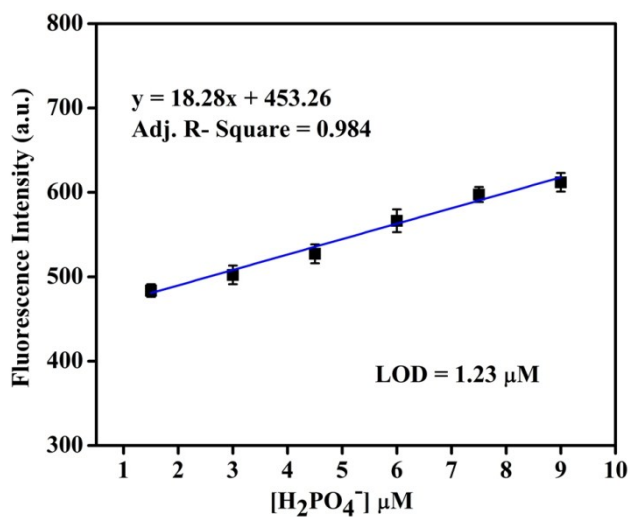

**Fig. S9.** Calibration curve in the nanomolar range, with error bars to calculate the LOD of H<sub>2</sub>PO<sub>4</sub><sup>-</sup> ion in reaction buffer at 25  $^{\circ}$ C (Fluorescence intensity was measured at 520 nm) ( $\lambda_{\text{ex}}$ : 355 nm).

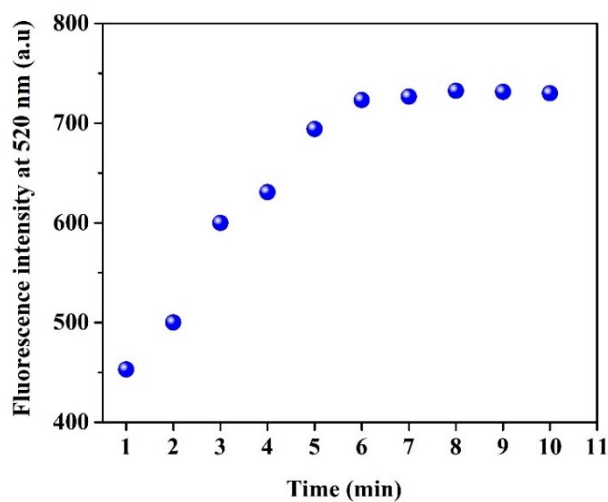

**Fig. S10.** Time dependent fluorescence study of  $\text{Zn}_2\text{L}_4$  complex ( $10\ \mu\text{M}$ ) in presence of  $\text{H}_2\text{PO}_4^-$  ion ( $100\ \mu\text{M}$ ) in reaction buffer at  $25\ ^\circ\text{C}$  ( $\lambda_{\text{ex}}$ :  $355\ \text{nm}$ ).

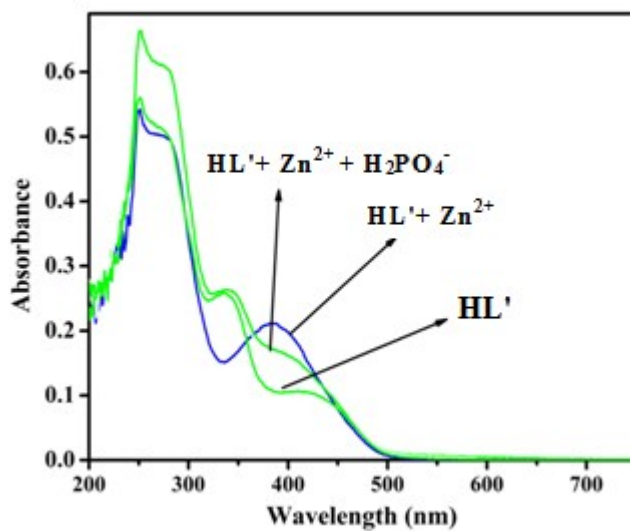

**Fig. S11.** UV-vis spectra of  $\text{HL}'$ ,  $\text{HL}' + \text{Zn}^{2+}$  ion, and  $\text{HL}' + \text{Zn}^{2+} + \text{H}_2\text{PO}_4^-$  ion in reaction buffer at  $25\ ^\circ\text{C}$ , (i.e. here also  $\text{HL}'$  as  $\text{HL}$  in solution state)

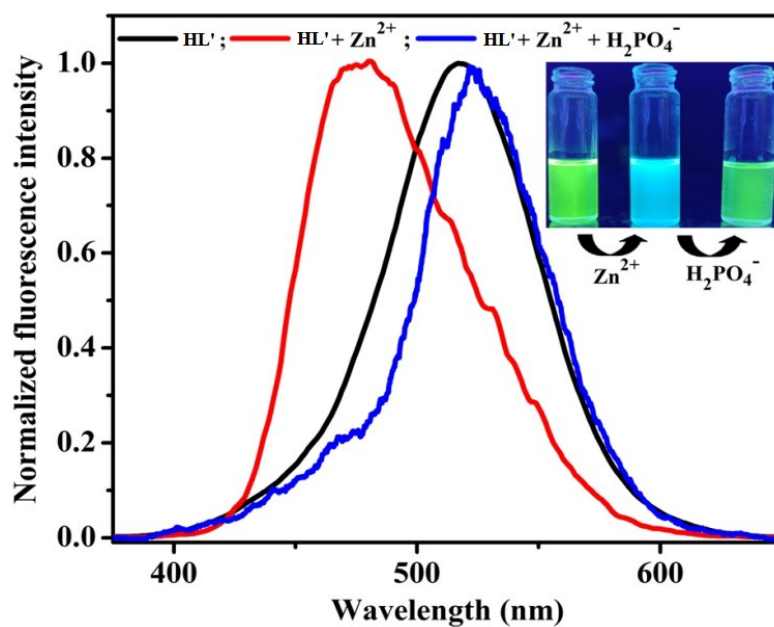

**Fig. S12.** Fluorescence spectra of HL', HL' + Zn<sup>2+</sup> ion, and HL' + Zn<sup>2+</sup> + H<sub>2</sub>PO<sub>4</sub><sup>-</sup> ion in reaction buffer at 25 °C ( $\lambda_{\text{ex}}$ : 355 nm) (here also HL' as HL in solution state)

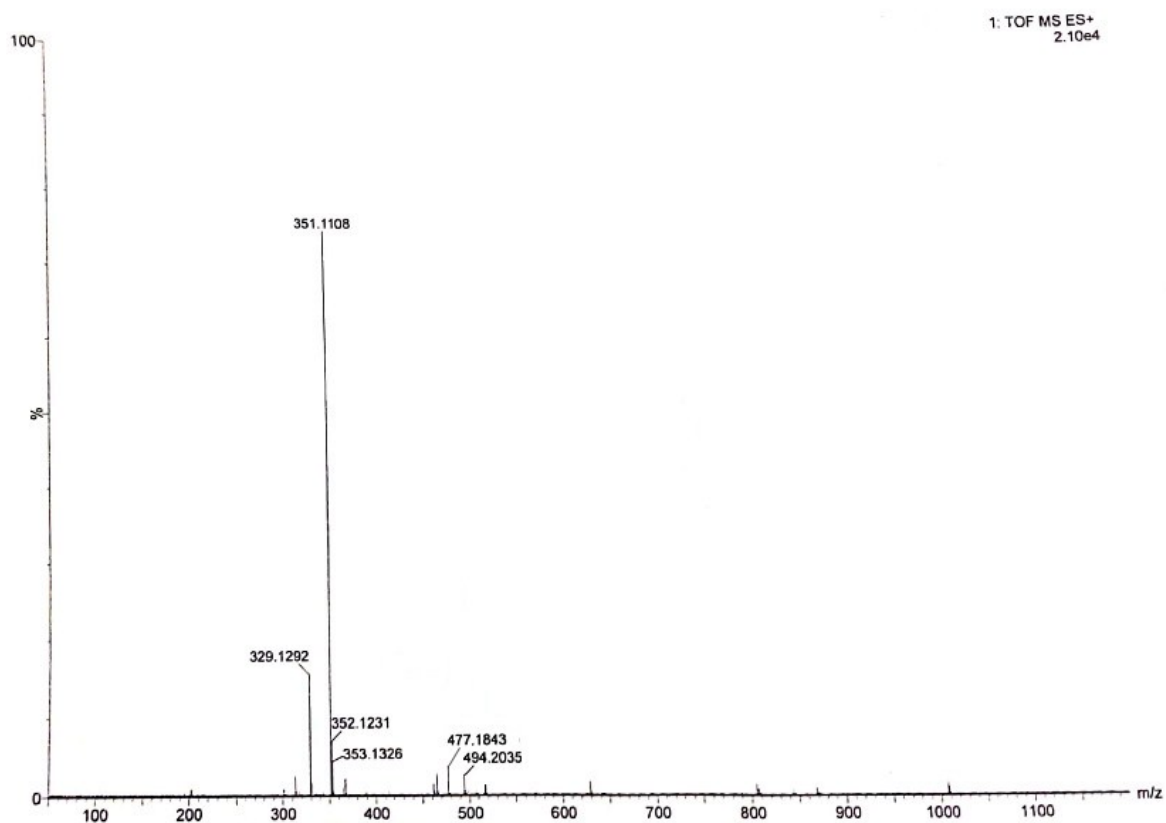

**Fig. S13.** HRMS data of the reaction between  $\text{Zn}_2\text{L}_4$  complex and  $\text{H}_2\text{PO}_4^-$  ion, found at m/z, 329.1292 and at m/z, 351.1108, calculated for  $[\text{M}+\text{H}^+]$  (m/z, 329.1285) and  $[\text{M}+\text{Na}^+]$  (m/z, 351.1104) respectively where M was  $\text{C}_{21}\text{H}_{16}\text{N}_2\text{O}_2$  (HL) in MeOH. Mass experiment was carried out with the filtrate obtained after the mixing of Zn(II) complex and  $\text{H}_2\text{PO}_4^-$  ion in the reaction buffer for 20 min.

**Table S1** Crystallographic data and details of refinements for HL' and Zn(II) complex.

|                                                                      |                                                               |                                                                                      |
|----------------------------------------------------------------------|---------------------------------------------------------------|--------------------------------------------------------------------------------------|
| Empirical Formula                                                    | C <sub>21</sub> H <sub>18</sub> N <sub>2</sub> O <sub>2</sub> | C <sub>85</sub> H <sub>61.50</sub> N <sub>8.50</sub> O <sub>10</sub> Zn <sub>2</sub> |
| Formula Weight                                                       | 330.37                                                        | 1492.66                                                                              |
| Crystal system                                                       | monoclinic                                                    | monoclinic                                                                           |
| Space group                                                          | <b><i>P</i> 2<sub>1</sub>/<i>c</i></b>                        | <b><i>C</i> 2/<i>c</i></b>                                                           |
| <i>a</i> (Å)                                                         | 16.0146(5)                                                    | 21.562(5)                                                                            |
| <i>b</i> (Å)                                                         | 7.3894(3)                                                     | 21.886(5)                                                                            |
| <i>c</i> (Å)                                                         | 14.6908(5)                                                    | 15.803(3)                                                                            |
| $\alpha$                                                             | 90.00°                                                        | 90.00°                                                                               |
| $\beta$                                                              | 101.708(2)°                                                   | 97.202(5)°                                                                           |
| $\gamma$                                                             | 90.00°                                                        | 90.00°                                                                               |
| Volume (Å <sup>3</sup> )                                             | 1702.31(11)                                                   | 7399(3)                                                                              |
| <i>Z</i>                                                             | 4                                                             | 4                                                                                    |
| $\rho_{\text{calc}}$ (g/cm <sup>3</sup> ); $\mu$ (mm <sup>-1</sup> ) | 1.289; 0.084                                                  | 1.340; 0.715                                                                         |
| $2\theta$ range (deg)                                                | 3.248- 26.702°                                                | 2.81- 27.47°                                                                         |
| Reflections collected                                                | 26400                                                         | 60557                                                                                |
| Reflections independent                                              | 3591                                                          | 9249                                                                                 |
| goodness of fit values                                               | 0.938                                                         | 1.058                                                                                |
| Final R indices [ <i>I</i> > 2 $\sigma$ ( <i>I</i> )]                | R = 0.0467 ,<br>wR2=0.1228                                    | R = 0.0503,<br>wR2= 0.1448                                                           |

**Table S2** Selected bond distances (Å) and bond angles (°) for HL'.

| Bond length (Å) |            |               |            |
|-----------------|------------|---------------|------------|
| O2 – C7         | 1.345(2)   | N1- C9        | 1.279(2)   |
| O1 - C1         | 1.201 (2)  | N1 - C10      | 1.416(2)   |
| O2 - H1         | 0.8200     | N2 – C15      | 1.391(2)   |
| C10 - C15       | 1.393(3)   | C2 - C3       | 1.393(2)   |
| N2 - H13        | 0.8600     | C15 – C14     | 1.389(3)   |
| N2 – C16        | 1.395(2)   |               |            |
| Bond angles (°) |            |               |            |
| C9- N1 –C10     | 121.26(16) | N2- C15- C10  | 118.74(16) |
| C14- C15- N2    | 122.38(18) | C4- C3- C2    | 122.67(18) |
| C15 -N2 -C16    | 126.39(16) | C7 –C6- C9    | 121.14(16) |
| N1- C9- C6      | 122.30(16) | C3- C4- C5    | 116.91(17) |
| N1- C9- H8      | 118.8      | C11 –C10- N1  | 122.38(18) |
| C16- C17 -C18   | 120.1(2)   | C19 –C18- C17 | 120.6(2)   |
| C14- C15- N2    | 122.81(21) |               |            |

**Table S3** Selected bond distances (Å) and bond angles (°) for Zn(II) complex.

| Bond length (Å) |             |               |            |
|-----------------|-------------|---------------|------------|
| Zn1– O2         | 2.0382(16)  | O4 – Zn1      | 2.1601(18) |
| Zn1– O1         | 2.0440 (17) | N1 – C8       | 1.321(3)   |
| Zn1– N3         | 2.0612(19)  | N2 – C16      | 1.389(3)   |
| Zn1– O4         | 2.1602(19)  | C2 - C3       | 1.393(4)   |
| N2 – C9         | 1.433(3)    | N5 – C51      | 1.023(10)  |
| N2 – C16        | 1.389(3)    |               |            |
| Bond angles (°) |             |               |            |
| O2- Zn1 - O1    | 96.87(7)    | C28- N3- Zn1  | 125.19(15) |
| O2- Zn1 – N3    | 155.51(7)   | C35- N3- Zn1  | 125.53(15) |
| O2- Zn1 – O4    | 87.09(7)    | C21- O2- Zn1  | 126.39(14) |
| N3- Zn1- O4     | 87.95(7)    | Zn1- O2- Zn1  | 102.54(7)  |
| N1- Zn1- O2     | 101.18(6)   | C29 –C34- C33 | 118.7(3)   |
| C15- N1 –Zn1    | 130.41(15)  | C37 –C36- C35 | 117.0(2)   |
| C8- N1 –Zn1     | 121.36(15)  |               |            |

Reference:

1. S. Lohar, S. Pal, B. Sen, M. Mukherjee, S. Banerjee and P. Chattopadhyay, *Anal. Chem.*, 2014, **86**, 11357.
